# Supplementary material
Source: PubMed Central journal article supplement (PMC4531305)
Supplement: NIHMS64456-supplement-01.pdf [file NIHMS64456-supplement-01.pdf]

Web Annex

Table 2a. Age-sex specific and sex-specific conversion ratios to estimate the prevalence of reference COA (post-bronchodilator FEV1/FVC < Lower Limit of Normal) from further commonly presented COA prevalence estimates and their respective modified GOLD II-IV estimates.

|                     | Pre-bronchodilator FEV1/FVC<LLN |        | Pre-bronchodilator FEV1/FVC<88% in M, < 89% in F |        |
|---------------------|---------------------------------|--------|--------------------------------------------------|--------|
|                     | Male                            | Female | Male                                             | Female |
| 40-49 years         | 0.63                            | 0.68   | 0.04                                             | 0.08   |
| 50-59 years         | 0.76                            | 0.67   | 0.11                                             | 0.07   |
| 60-69 years         | 0.66                            | 0.61   | 0.12                                             | 0.11   |
| 70+ years           | 0.85                            | 0.81   | 0.16                                             | 0.13   |
| 40+ years           | 0.72                            | 0.68   | 0.09                                             | 0.09   |
| 40+ years, FEV1<80% | 0.92                            | 0.90   | 0.31                                             | 0.24   |
